# Supplementary material
Source: publisher site journal article supplement (https://www.dovepress.com/article/399299)
Supplement: Supplementary file 1 [file get_supplementary_file.php]

**Supplementary files**

**
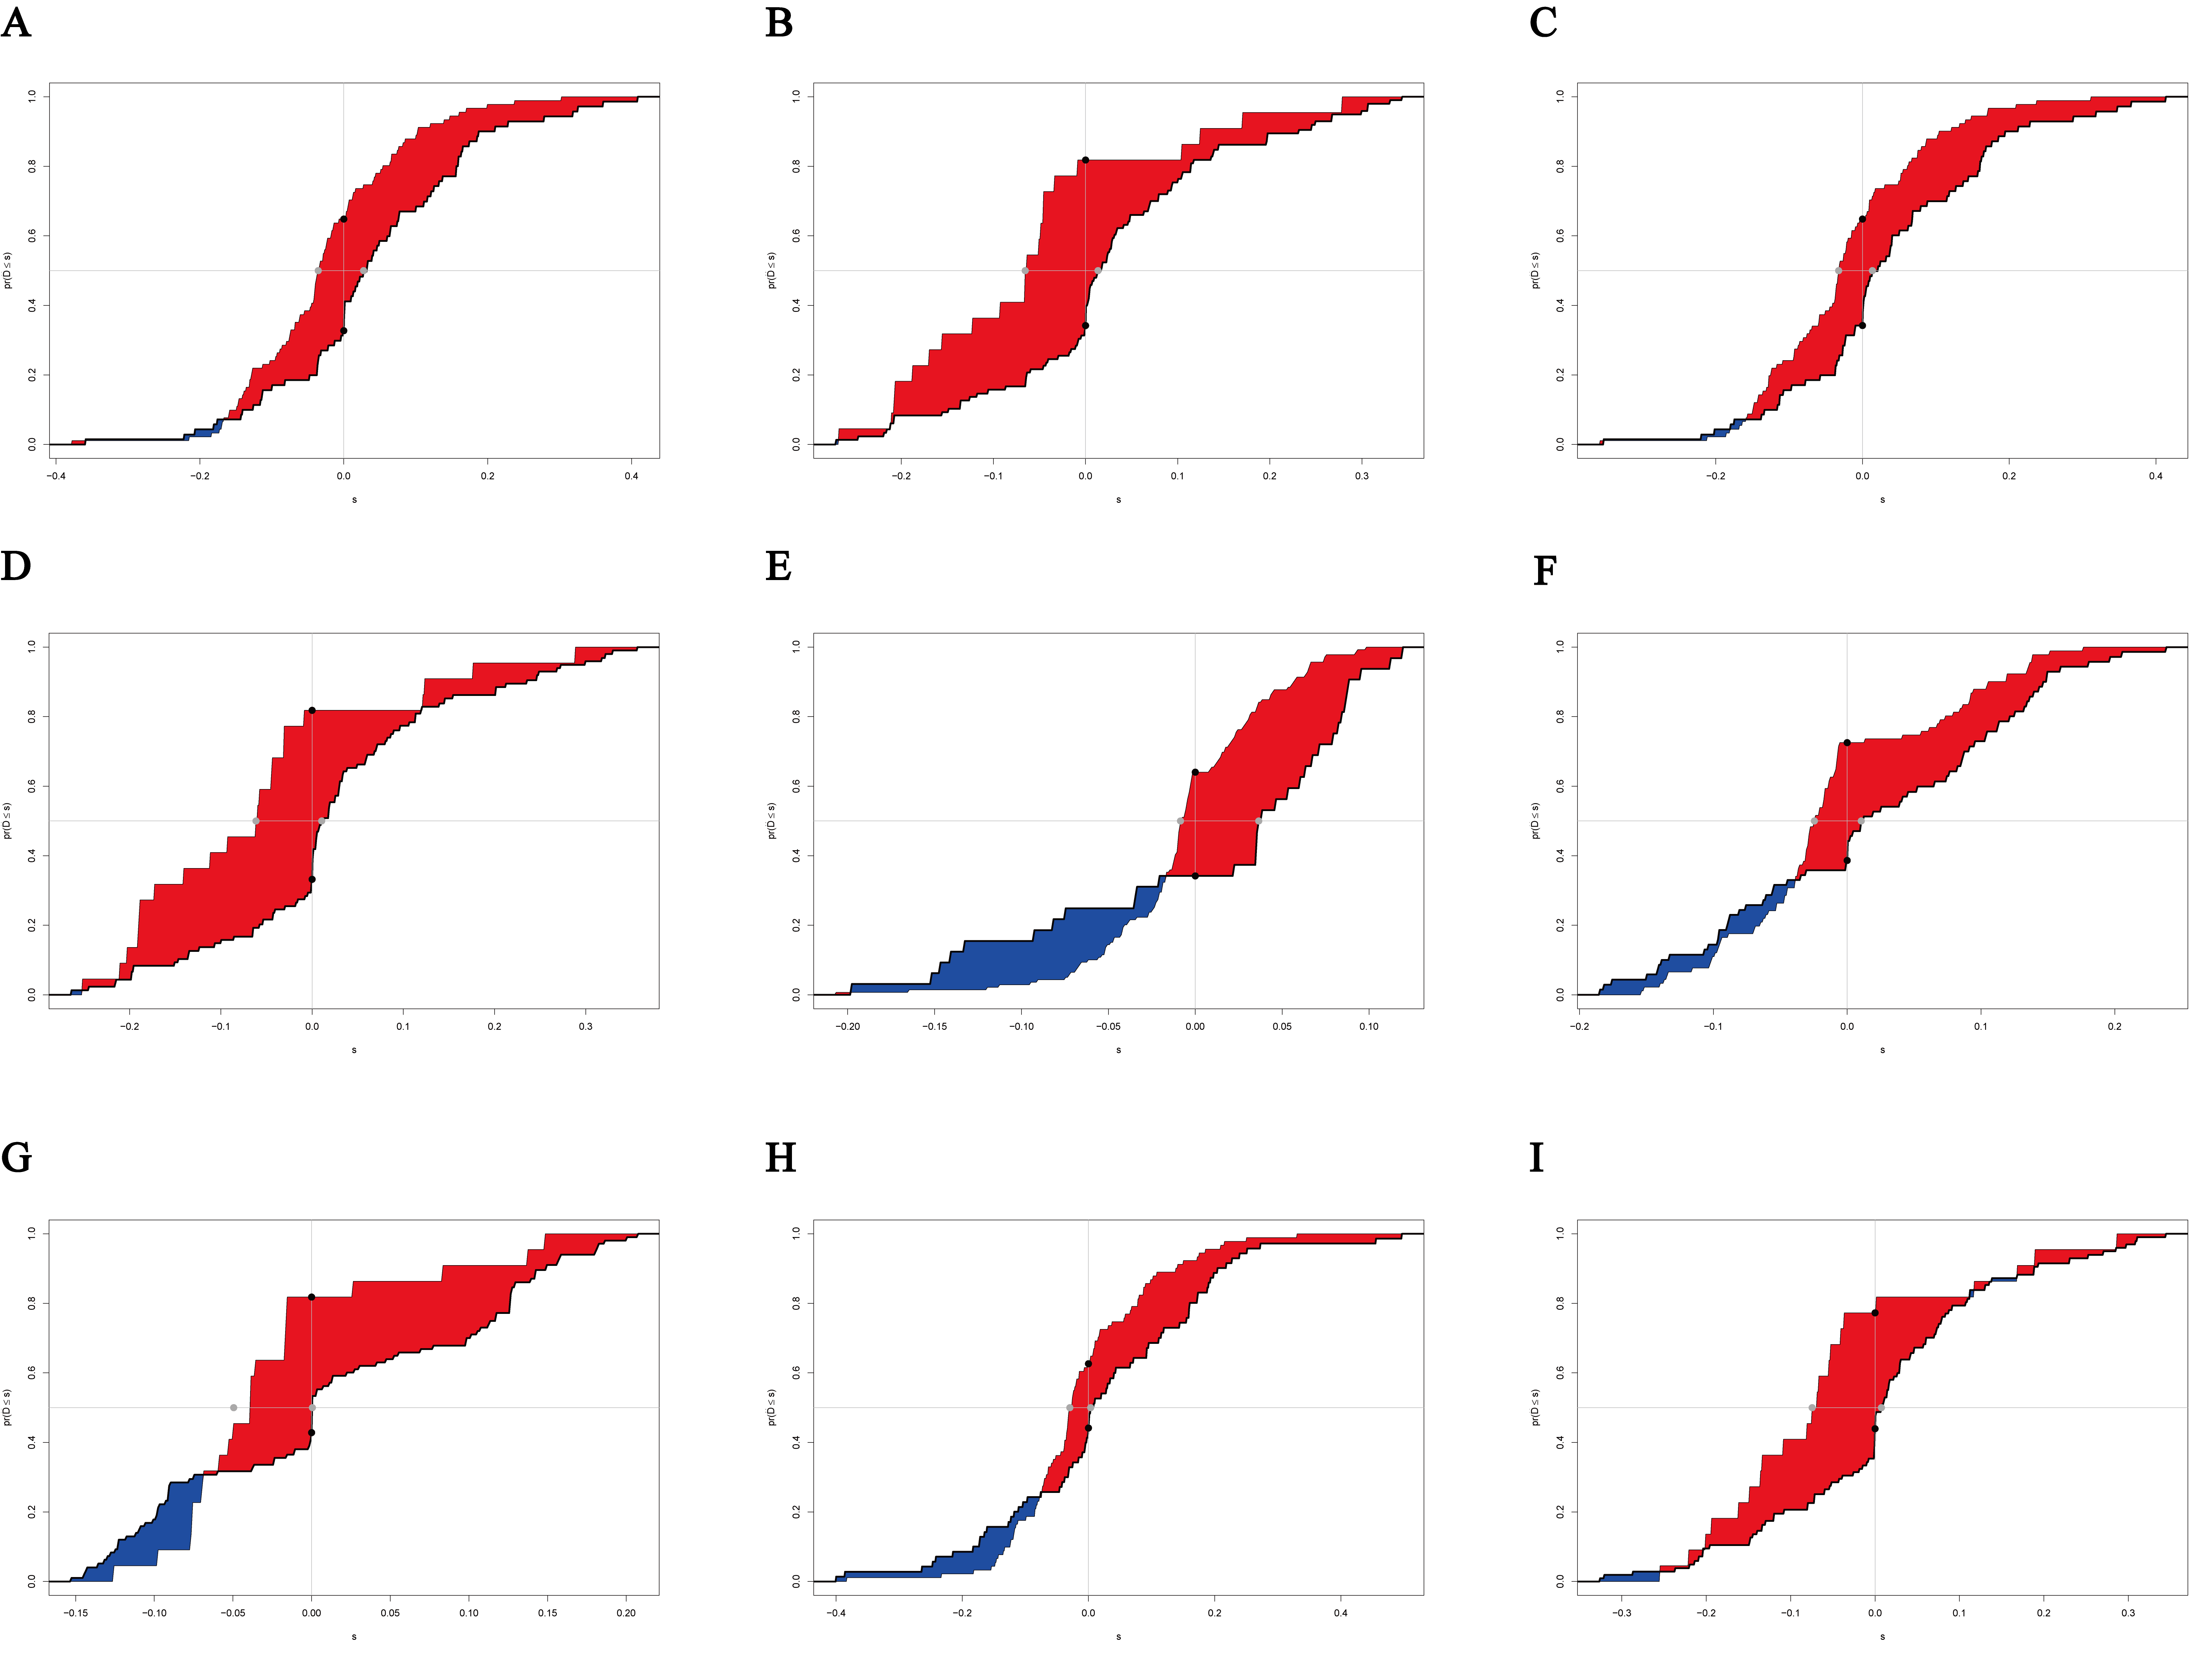
**

**Figure S1**

**Supplementary Figure legend**

**Figure S1**: The IDI and continuous NRI values of comparison between the final model and other models. Comparison between the final model and AJCC stage for predicting (A)1-year, and (B) 2-year OS. Comparison between the final model and BCLC stage for predicting (C)1-year, and (D) 2-year OS. Comparison between the final model and the model without “VEGF” for predicting (E) 6-month, (F)1-year, and (G) 2-year OS. Comparison between the final model and CNLC stage for predicting (H)1-year, and (I) 2-year OS.

**Table S1. Sorafenib-related adverse events during TACE-sorafenib therapy**

| Adverse Event | All Grades | Grade 1-2 events | Grade 3-4 events |
| --- | --- | --- | --- |
| hand-foot-skin reactions | 54 (54.5) | 44 (44.4) | 10 (10.1) |
| Diarrhea | 24 (24.2) | 16 (16.1) | 8 (8.1) |
| Rash | 5 (5.1) | 4 (4.0) | 1 (1.0) |
| Hypertension | 4 (4.0) | 2 (2.0) | 2 (2.0) |
| Arthralgia | 4 (4.0) | 4 (4.0) | 0 (0) |
| Gingival bleeding | 4 (4.0) | 4 (4.0) | 0 (0) |
| Fatigue | 3 (3.0) | 2 (2.0) | 1 (1.0) |
| Anorexia | 2 (2.0) | 1 (1.0) | 1 (1.0) |
| Alopecia | 2 (2.0) | 1 (1.0) | 1 (1.0) |
| Epistaxis | 1 (1.0) | 1 (1.0) | 0 (0) |
| Voice change | 1 (1.0) | 1 (1.0) | 0 (0) |

**Table S2 Identification of prognostic factors for PFS in all-patient, the TACE group, and the TACE-Sorafenib group based on univariate Cox regression**

|  | All-Patient | |  | TACE group | |  | TACE-Sorafenib group | |
| --- | --- | --- | --- | --- | --- | --- | --- | --- |
| Baseline Factor | HR (95%CI) | *p-*value |  | HR (95%CI) | *p-*value |  | HR (95%CI) | *p-*value |
| Treatment (T+S vs. T) | 1.13(0.75-1.71) | 0.552 |  | — | — |  | — | — |
| Age (> vs. ≤60) | 0.53(0.34-0.83) | 0.006 |  | 0.46(0.22-0.99) | 0.048 |  | 0.60(0.34-1.06) | 0.078 |
| Child-Pugh stage (B vs. A) | 1.43(0.58-3.51) | 0.441 |  | 1.37(0.42-4.52) | 0.602 |  | 1.53(0.37-6.33) | 0.560 |
| Tumor size (> vs. ≤5cm) | 1.95(1.20-3.16) | 0.007 |  | 2.38(1.08-5.27) | 0.032 |  | 1.74(0.95-3.22) | 0.075 |
| No. of tumors |  |  |  |  |  |  |  |  |
| 2-3 vs.1 | 1.11(0.53-2.30) | 0.783 |  | 1.15(0.35-3.74) | 0.821 |  | 0.96(0.38-2.42) | 0.928 |
| ≥ 4 vs.1 | 2.22(1.39-3.56) | 0.001 |  | 2.96(1.32-6.62) | 0.008 |  | 1.78(0.99-3.17) | 0.053 |
| PVTT (Yes vs. No) | 2.80(1.83-4.28) | <0.001 |  | 2.67(1.26-5.65) | 0.010 |  | 2.76(1.64-4.65) | <0.001 |
| EHS (Yes vs. No) | 1.67(1.03-2.72) | 0.039 |  | 1.20(0.41-3.49) | 0.735 |  | 1.73(0.98-3.03) | 0.057 |
| AFP (> vs. ≤400ng/mL) | 2.91(1.93-4.39) | <0.001 |  | 3.19(1.60-6.35) | 0.001 |  | 2.87(1.70-4.87) | <0.001 |
| Tbil (> vs. ≤17.5μmol/L) | 1.31(0.88-1.96) | 0.183 |  | 0.75(0.39-1.44) | 0.390 |  | 2.13(1.26-3.60) | 0.005 |
| ALP (> vs. ≤122.5U/L) | 1.69(1.13-2.54) | 0.011 |  | 1.42(0.73-2.76) | 0.296 |  | 1.87(1.13-3.12) | 0.016 |
| NLR (> vs. ≤2.94) | 1.66(1.11-2.47) | 0.013 |  | 1.36(0.70-2.64) | 0.367 |  | 1.84(1.11-3.05) | 0.017 |
| VEGF (> vs. ≤172.48pg/ml) | 2.01(1.32-3.06) | <0.001 |  | 1.75(0.89-3.46) | 0.106 |  | 2.10(1.23-3.58) | 0.006 |

T+S, TACE plus sorafenib; PVTT, portal vein tumor thrombus; EHS, extrahepatic spread; AFP, alpha-fetoprotein; Tbil, total bilirubin; ALP, alkaline phosphatase; NLR, neutrophil-lymphocyte ratio; VEGF, vascular endothelial growth factor.

**Table S3 Identification of independent prognostic factors for PFS in all-patient, the TACE group, and the TACE-Sorafenib group based on multivariate Cox regression**

|  | All-Patient | |  | TACE group | |  | TACE-Sorafenib group | |
| --- | --- | --- | --- | --- | --- | --- | --- | --- |
| Baseline Factor | HR (95%CI) | *p-*value |  | HR (95%CI) | *p-*value |  | HR (95%CI) | *p-*value |
| No. of tumors | — | — |  | — | — |  | — | — |
| 2-3 vs.1 | 1.36(0.62-3.00) | 0.444 |  | 1.25(0.35-4.45) | 0.731 |  | — | — |
| ≥ 4 vs.1 | 1.88(1.13-3.14) | 0.016 |  | 2.49(1.07-5.77) | 0.034 |  | — | — |
| AFP (> vs. ≤400ng/mL) | 2.36(1.50-3.73) | <0.001 |  | 2.60(1.24-5.47) | 0.012 |  | 2.57(1.44-4.58) | 0.001 |
| VEGF (> vs. ≤172.48pg/ml) | 1.64(1.03-2.60) | 0.037 |  | — | — |  | 2.00(1.11-3.62) | 0.021 |

AFP, alpha-fetoprotein; VEGF, vascular endothelial growth factor.
